# Supplementary material for: Dronedarone hydrochloride inhibits gastric cancer proliferation in vitro and in vivo by targeting SRC
Source: PubMed Central journal article supplement — Transl Oncol. 2024 Oct 5;50:102136. doi: 10.1016/j.tranon.2024.102136 (PMC11491965; doi:10.1016/j.tranon.2024.102136), 2024-10-05
Supplement: mmc1.pdf [file mmc1.pdf]

A

HGC27

Temp (°C)

37 40 43 46 49 52 55 58 61 64 67 70

Vehicle

DH

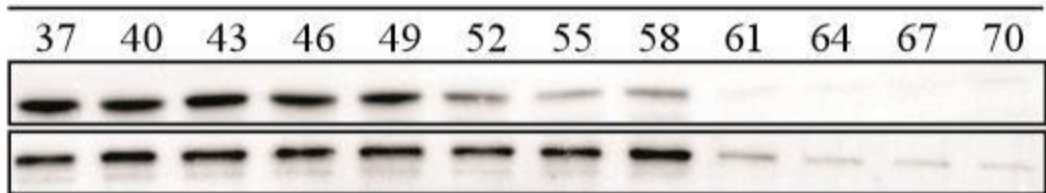

B

AGS

Temp (°C)

37 40 43 46 49 52 55 58 61 64 67 70

Vehicle

DH

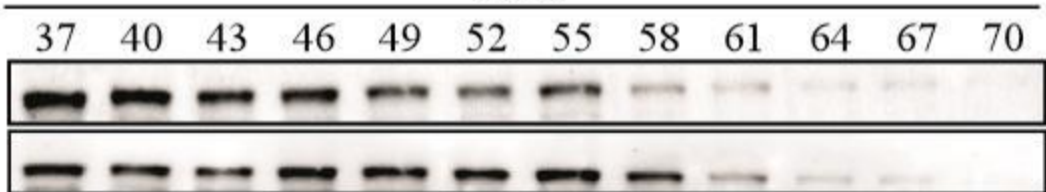

**Fig S1. Dronedarone hydrochloride bound to SRC detect by cellular thermal shift assay**

(A, B) Representative Western blot images of CETSA for HGC27(A) and AGS(B) cells.
