# Supplementary material for: Dronedarone hydrochloride inhibits gastric cancer proliferation in vitro and in vivo by targeting SRC
Source: PubMed Central journal article supplement — Transl Oncol. 2024 Oct 5;50:102136. doi: 10.1016/j.tranon.2024.102136 (PMC11491965; doi:10.1016/j.tranon.2024.102136), 2024-10-05
Supplement: mmc2.pdf [file mmc2.pdf]

A

Dronedarone hydrochloride ( $\mu\text{M}$ )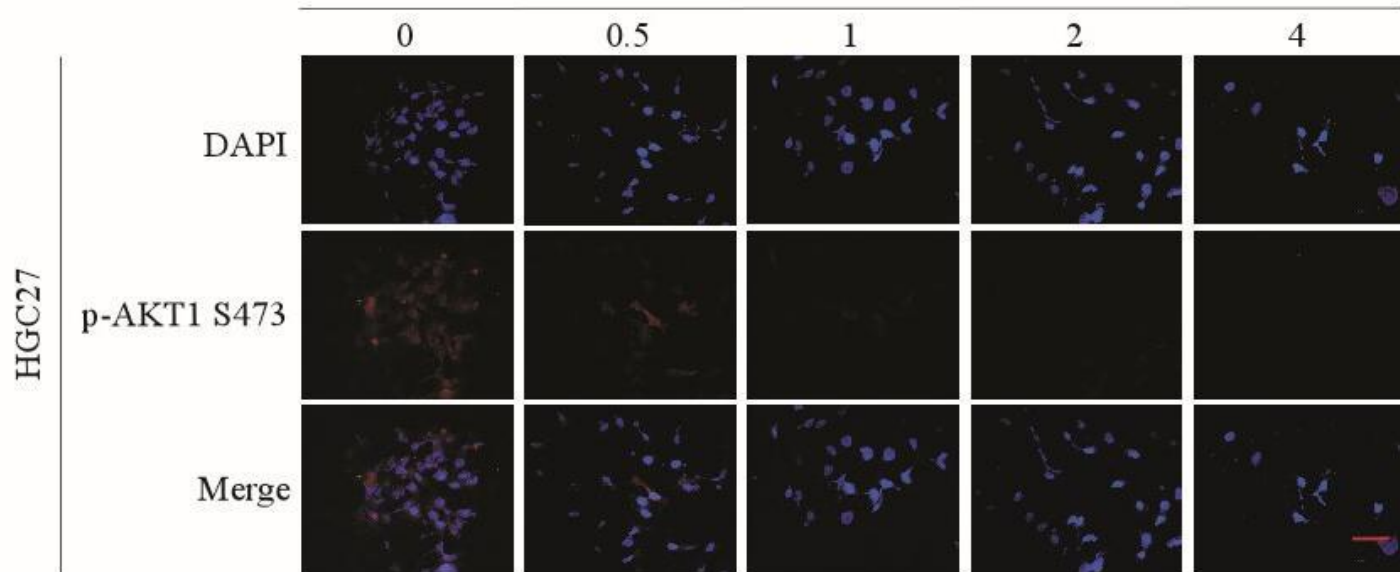

B

Dronedarone hydrochloride ( $\mu\text{M}$ )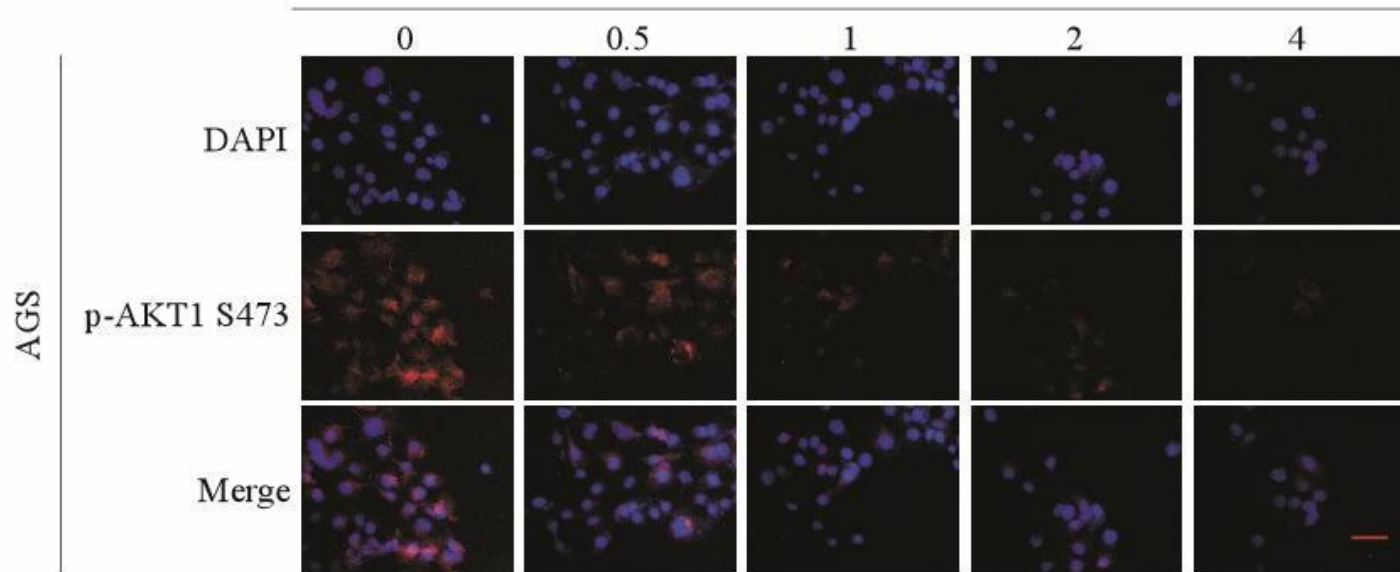

**Fig S2. DH inhibited the AKT1 phosphorylation in gastric cancer**

(A, B) Representative images of immunofluorescence staining of p-AKT1 S473 in HGC27 (A) and AGS (B) cells after DH treatment.
