# Supplementary material for: Dronedarone hydrochloride inhibits gastric cancer proliferation in vitro and in vivo by targeting SRC
Source: PubMed Central journal article supplement — Transl Oncol. 2024 Oct 5;50:102136. doi: 10.1016/j.tranon.2024.102136 (PMC11491965; doi:10.1016/j.tranon.2024.102136), 2024-10-05
Supplement: mmc3.pdf [file mmc3.pdf]

sgControl

sgSRC#2

sgSRC#5

HGC27

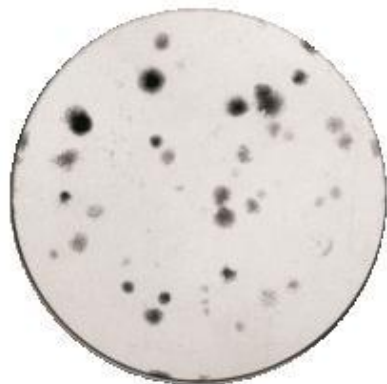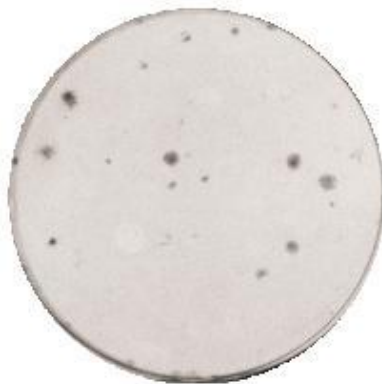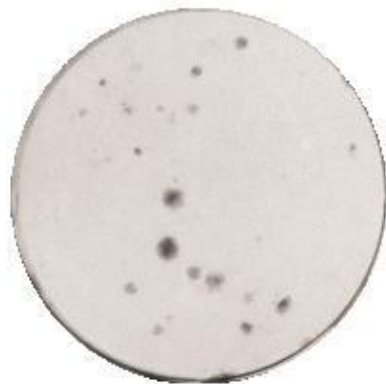

AGS

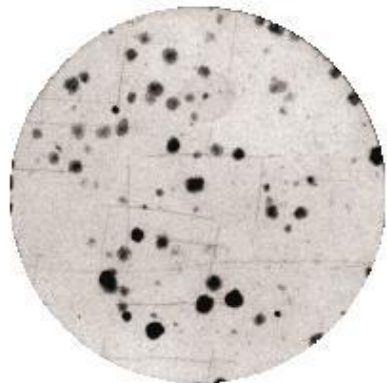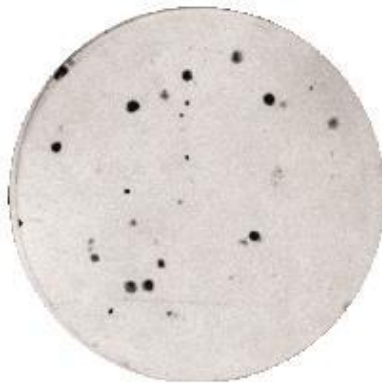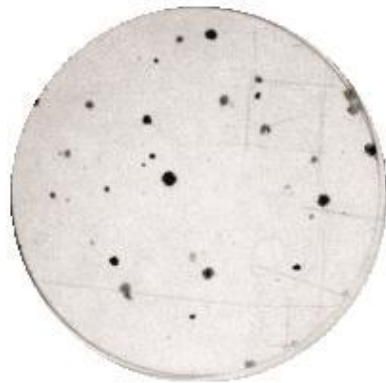

**Fig S3.SRC knockout inhibited the growth of gastric cancer cells**

Representative images of colony formation assay of gastric cancer cells after SRC knockout.
