# Supplementary material for: Dronedarone hydrochloride inhibits gastric cancer proliferation in vitro and in vivo by targeting SRC
Source: PubMed Central journal article supplement — Transl Oncol. 2024 Oct 5;50:102136. doi: 10.1016/j.tranon.2024.102136 (PMC11491965; doi:10.1016/j.tranon.2024.102136), 2024-10-05
Supplement: mmc4.pdf [file mmc4.pdf]

A

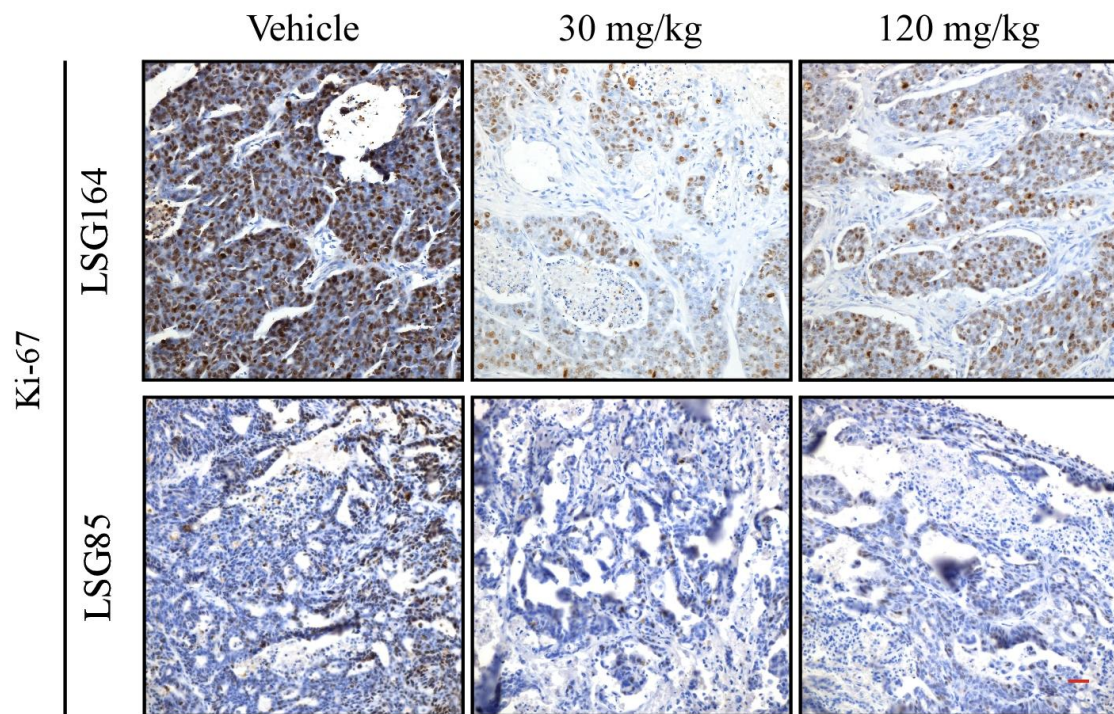

B

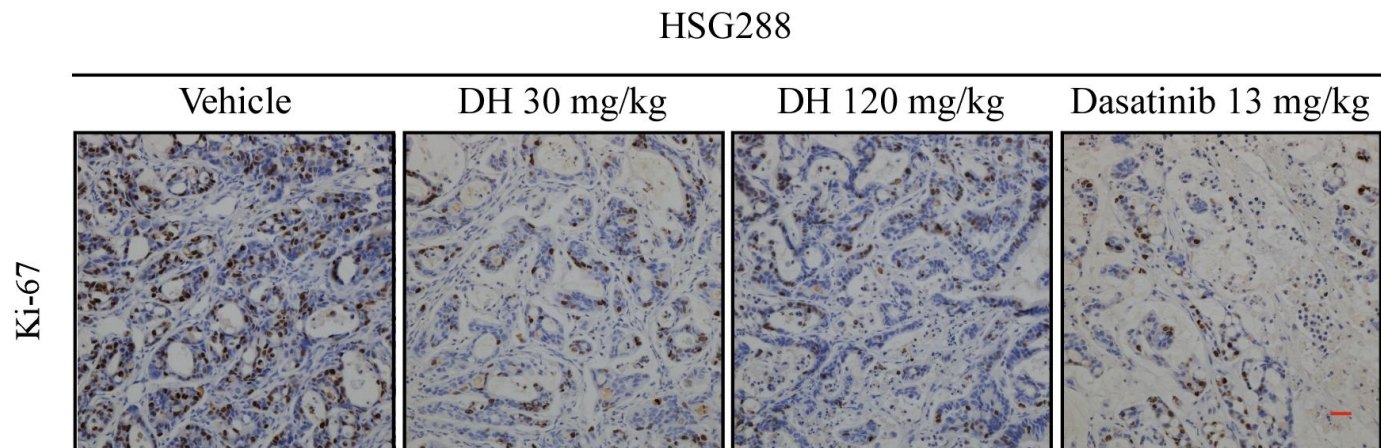

**Fig S4. Ki67 staining of mouse tumor tissues**

(A) Representative images of Ki67 immunohistochemical staining in tumor tissues from treated or untreated groups. (B) Representative images of Ki67 immunohistochemical staining from DH treated, DH treated or untreated groups.
